1

2

3

4 Diotic and dichotic frequency discrimination thresholds in musicians and non-musicians: relationships  
5 between perception, musical ability and self-evaluated competence.

6

7 Gabriella Musacchia <sup>1,2\*</sup>¶, Devin Inabinet <sup>1¶</sup>, Jan De La Cruz <sup>1¶</sup>, Justin Cha <sup>1&</sup>, Kevin Ng <sup>1&</sup>

8 <sup>1</sup> Department of Audiology, University of the Pacific, San Francisco, California, United States of  
9 America

10 <sup>2</sup> Otolaryngology Head and Neck Surgery, Stanford University, Palo Alto, California, United States of  
11 America

12

13 \*Corresponding Author

14 E-mail: [gmusacchia@pacific.edu](mailto:gmusacchia@pacific.edu) (GM)

15

16 ¶ These authors contributed equally to this work

17 & These authors also contributed equally to this work

18 **Abstract**

19 Pitch perception provides important information for musical and vocal communication. Numerous studies  
20 have shown that musical training and expertise are associated with better pitch processing, however, it is  
21 unclear what types of pitch percepts are plastic with music training. The current study addresses this issue  
22 by measuring discrimination thresholds of Musicians (n=20) and Non-musicians (n=18) to diotic (same  
23 sound to both ears) and dichotic (different sounds to each ear) stimuli created from four types of acoustic  
24 computations: 1) pure sinusoidal tones, PT; 2) four-harmonic complex tones, CT; 3) iterated rippled  
25 noise, IRN; and 4) interaurally correlated broadband noise, called “Huggins” or “dichotic” pitch sounds,  
26 DP. Frequency Difference Limens (DLF) in each condition were obtained via a 3-alternative-forced-  
27 choice adaptive task requiring selection of the interval with the highest pitch, yielding the smallest  
28 perceptible fundamental frequency (F0) distance (in Hz) between two sounds. Music skill was measured  
29 by an online test of musical Pitch, Melody and Timing (International Laboratory for Brain Music and  
30 Sound Research, <https://www.brams.org/en/onlinetest/>). Musicianship, length of music experience and  
31 self-evaluation of musical skill were assessed by questionnaire. Results showed musicians had smaller  
32 DLFs in all four conditions and that thresholds were related to subjective and objective musical ability. In  
33 addition, self-report of musical ability was shown to be a significant variable in group classification,  
34 suggesting that the neurobehavioral profile of musicians includes self-evaluation of musical competence.

35

## 36 **Introduction**

37 Musical training is associated with better pitch encoding and perception (for review see (1)). In music,  
38 pitch is the quality that most strongly defines the perception of the melodic contour. Each note in a  
39 melody has a pitch that is related to the lowest frequency of an instrumental sound, called the fundamental  
40 frequency (F0). The perception of pitch, however, is not only evoked by musical sound, but can emerge  
41 from a wide variety of acoustic components (for review see (2)). A classic way to determine someone's  
42 pitch perception ability is by measuring the smallest perceptible pitch change from a center frequency,  
43 called a *difference limen for frequency* (DLF) (3, 4). In general, normal-hearing listeners can perceive a  
44 change in as little as 2-3 Hz from a center frequency under optimal listening conditions (5). Musicians can  
45 detect even smaller pitch changes, sometimes so minute that the change is undetectable by otherwise  
46 normal-hearing non-musicians (2, 6, 7). Not surprisingly, increased acuity in musicians is not limited to  
47 musical sounds, but extends to perception and processing of speech (8), non-speech ((6) for review (9))  
48 and non-native language sounds (10).

49 A prevalent hypothesis is that musical training improves auditory encoding mechanisms that give rise to  
50 pitch perception. However, the auditory system utilizes several mechanisms to encode pitch-related  
51 acoustics and it is unclear which ones are most improved with music training. One way the auditory  
52 system works is by representing the “temporal code” of a stimulus in which auditory neurons *phase-lock*,  
53 firing at a rate that matches the period, or frequency inverse, of a sound (for review see (11)). During  
54 temporal encoding, sounds trigger networks of neurons to compute and extract temporal patterns that can  
55 give rise to pitch perception (12, 13). Music practice and performance could activate and strengthen the  
56 temporal synchrony of these networks, thereby improving representation and higher-order computation  
57 acuity. Another mechanism to encode pitch, called “place code”, functions such that different frequencies  
58 activate discrete regions of the inner ear and subsequent nuclei, producing a tonotopic map of frequencies  
59 at each processing station (for review, see (14)). For example, the perception of pitch rises as the region  
60 of maximal activation on the basilar membrane moves closer to the base of the cochlea. Music training

61 could generate more precise and definite tonotopic maps due to top-down modulation induced by the  
62 increased prevalence and relevance of sounds in the musician's environment (15-17). Finally, a pitch  
63 perception can be generated by presenting different sound components to each ear, creating a *dichotic*  
64 (binaural) or combined estimation of the sound's pitch (18, 19). Although the music-related mechanistic  
65 hypotheses are less prevalent for dichotic plasticity, it is reasonable to suggest that music training could  
66 increase the accuracy of communication between the left and right ears, particularly during azimuth  
67 (horizontal) localization tasks such as identification of instruments in an orchestra (20). To encode sound,  
68 the auditory system will use or integrate information gathered from each encoding strategy presented  
69 above, depending on what acoustic features are present in the stimulus.

70 The working hypothesis that motivated this study was that music training engenders plasticity in specific  
71 auditory encoding mechanisms. Particularly, we posited that sounds reliant on temporal encoding would  
72 be impacted the most because playing music requires considerable focus on sound timing. To test this, we  
73 measured DLFs in musicians and non-musicians using four different types of sounds with different pitch-  
74 related acoustics (Fig. 1). Creation of the sounds was inspired by work describing how different degrees  
75 of temporal, place and dichotic encoding mechanisms can be elicited in the auditory system (21). In order  
76 to assess musical skill, all participants took an online musical test for pitch, melody and timing  
77 measurements and filled out a questionnaire that probed duration of musical training and subjective self-  
78 reports of musical skill and listening habits.

## 79 **Materials and Methods**

80 **PARTICIPANTS:** 38 individuals with audiometric thresholds within normal limits (<25dB HL for 0.25,  
81 0.5, 1, 2, 3, 4, 6 and 8 kHz) and no history of neurological disorders participated in the study. Previous  
82 research has shown that music-related brain plasticity is most effective when people begin playing music  
83 early, continue, and are currently practicing (22-24). Therefore, subject inclusion criteria in the Musician  
84 (MU) group included 1) self-identification as a musician via questionnaire and reported current  
85 involvement in musical activities, 2) self-report of music training initiation before high school (e.g. before

86 grade 9, age 14-15) and 3) a total of at least 5 years in formal music education. 20 subjects fulfilled the  
 87 criteria for MU group inclusion, with the remainder 18 subjects grouped into Non-musicians (NM).  
 88 Group characteristics of age, music education, self-ratings and objective measures of musical skill (i.e.  
 89 online aptitude test, for description see below) are presented in Table 1.

| Group                | Metric    | Self-reported Music Education (yrs.) |                 |                       | Self-reported Musical Skill and Listening (Scale 1-9) |                              | Objective Musical Skill Scores (MBEA) (%) |        |        |            |
|----------------------|-----------|--------------------------------------|-----------------|-----------------------|-------------------------------------------------------|------------------------------|-------------------------------------------|--------|--------|------------|
|                      |           | Age at Test                          | Age Began Music | Total Music Education | SR Musical Skill                                      | SR Music Listening Frequency | Melody                                    | Timing | Pitch  | Total/Avg. |
| Non-musicians (n=18) | Mean      | 25.11                                | 7.63            | 5.13                  | 2.22                                                  | 7.00                         | 84.28                                     | 86.89  | 88.06  | 86.22      |
|                      | Std. Dev. | 1.906                                | 2.875           | 2.416                 | 1.629                                                 | 1.680                        | 7.466                                     | 6.296  | 11.254 | 5.342      |
| Musicians (n=20)     | Mean      | 23.75                                | 7.60            | 12.20                 | 7.05                                                  | 7.20                         | 90.90                                     | 93.10  | 95.75  | 92.9       |
|                      | Std. Dev. | 5.543                                | 3.202           | 4.099                 | .759                                                  | 1.609                        | 6.782                                     | 4.909  | 4.541  | 3.782      |

Self-reported music education, music skill and listening frequency measures obtained via questionnaire and are reported in years. Only 8 Non-musicians had previous music education. Self-reported music skill was rated on a scale from 1-9, with 1 being “novice” and 9 denoting “professional”. Music listening frequency was rated on a scale from 1-9 with 1 being “never” and 9 “all the time”. Melody, Timing, Pitch and Average/Total musical skill scores obtained via online aptitude test ([www.brams.org](http://www.brams.org)) and are reported in percent correct.

90

91 STIMULI. Sounds were 300 ms in duration, with two 60-ms raised cosine ramps for onset and offset.  
 92 Figure 1 shows time waveforms (left panels) and frequency spectra (right panels) for the 440 Hz  
 93 (standard) stimuli used in the study. 440 Hz was chosen because it is a familiar musical note (A4) that  
 94 elicits strong phase-locking.

95 In order to test binaural mechanisms, we created a dichotic pitch (DP) stimulus, often called “Huggins’  
 96 pitch,” which consists of dissimilar right and left inputs to make a dichotic estimation of a sound’s pitch  
 97 (18, 19). DP stimuli were created with the Binaural Auditory Processing Toolbox for MATLAB8 using a  
 98 transition width of 16%. DP sounds were made of white noise, diotic at all frequencies except for a  
 99 narrow band at the F0 (440 Hz), over which the interaural phase transitioned progressively through 360°.  
 100 Individuals were familiarized with DP perception through five online Demonstrations  
 101 (<https://web.stanford.edu/~bobd/cgi-bin/research/dpDemos/>).

102

-Figure 1-

103 Figure 1. Study stimuli. Each row shows the 440 Hz stimulus waveform (right panel) and spectrum on a  
104 logarithmic frequency scale (left panel). A. Dichotic pitch with an interaural phase shift of 440 Hz, B.  
105 Pure Tone, C. Iterated Rippled Noise with a 64 iteration of delay and add at 1/440 s. D. Complex tone  
106 with three overtone harmonics

107 In contrast, a pure tone (PT), shown in panel B of Figure 1 is the product of a sinusoidal function.  
108 Sinusoids are thought to be encoded by place code mechanisms because they elicit narrow bands of  
109 maximal activation at specific places in the tonotopic map of the cochlea. At lower frequencies ( $< \sim 2$  kHz)  
110 elicit additional phase-locked temporal codes at the frequency's period. Pure tones consisted of sinusoids  
111 at a fundamental frequency (F0) of 440 Hz, chosen.

112 We also tested an iterated noise (IRN) stimulus which evokes a pitch perception that is primarily reliant  
113 on temporal information (25-27). IRN stimuli, shown in Figure 1C, were created from Gaussian  
114 broadband noise filtered from 80-3000 Hz with 64 iterations of delay and add durations at the inverse of  
115 the F0 (440 Hz). The temporal regularity imposed on broadband noise gives rise to the perception of pitch  
116 despite low spectral content.

117 Finally, we used a complex tone with three harmonic overtones (CT), which most closely resembles the  
118 sound a musical instrument makes and relies on a combination of place and temporal codes. Complex  
119 tones (Fig. 1D) consisted of a four-harmonic complex (h1-h4) with equal amplitude and the same F0 (440  
120 Hz).

121 MUSICAL APTITUDE TEST: Individuals completed an online test through the International Laboratory  
122 for Brain, Music, and Sound Research (BRAMS, [www.brams.org/en/onlinetest/](http://www.brams.org/en/onlinetest/)) that allows for the  
123 assessment of the functioning of each musical component: 1) Melody, 2) Timing, and 3) Pitch ability. The  
124 online test battery is based on the Montreal Battery for Evaluation of Amusia (MBEA) and consists of  
125 musical phrases that vary along the melody, timing or pitch dimension (28). During the MBEA, listeners

126 perform a two-alternative forced choice task to determine whether two presented musical phrases are the  
127 same or different. In the melody test, for example, the two choices may consist of an original melodic  
128 contour and a scale- or contour-violated alternate. The output of the online test is a percentage correct for  
129 each task, in addition to the average of all three categories. These percentages were recorded and utilized  
130 in this study. Group means and standard deviations are shown in Table 1.

131 QUESTIONNAIRE: Participants' musical history was collected through a questionnaire probing a range  
132 of information regarding subjective aptitude and measures of musicianship. We used the following  
133 details and scale-based ratings to correlate with objective performance on psychoacoustic measures: 1)  
134 Musician self-identification (e.g. "Are you a musicians?"), 2) Self-Report of Music Listening Frequency  
135 on a scale of 1-9 3) Self-Report of Musical Skill on a scale of 1-9 4) Age of Music Start and 5) Years of  
136 Consistent Practice. Group means and standard deviations are shown in Table 1.

137 DATA ANALYSIS: Tests of normality were computed on all variables. Results of these tests showed that  
138 the pairs of MU and NM distributions were not significantly different from normal according to or  
139 Shapiro-Wilk tests ( $p < 0.01$ ), except for SR Musical Skill and BRAMS Pitch score (See Supplementary  
140 Table 1). Examination of the detrended SR Musical Skill scores showed that one NM rated themselves  
141  $>1$  Standard Deviation from normal and one MU rated themselves  $>-1$  Standard Deviation from normal.  
142 Examination of the detrended BRAMS pitch scores showed that one individual from each group scored  $>-$   
143  $1$  Standard Deviation from normal. Given that a skew in distribution was observed for two measures, we  
144 provide observed power for each test and only conducted tests that were robust to the assumption of  
145 normality (29, 30).

146 The group difference hypothesis was tested using a set of mixed repeated-measures ANOVAs  
147 (RMANOVA) for group (Musicians vs. Non-musicians, 2 between-subjects factors) and the following  
148 within-subjects factors: 1) sound type threshold (CT, PT, IRN, DP, 4 within-subjects factors), 2) sound  
149 type standard deviation (CT, PT, IRN, DP, 4 within-subjects factors), 3) self-reported measures of music  
150 skill and 4) listening frequency from the questionnaire (SR Musical Skill and SR Frequency of Music

151 Listening, 2 within-subject factors). F-statistics, p-values and the observed statistical power, ranging from  
152 0 to 1, where the fraction represents the chance of failing to detect an effect, are reported with each  
153 significant ANOVA result. Post-hoc t-tests were conducted when significant interaction effects with p-  
154 val<0.05 were observed.

155 To examine the question of a relationship between DLFs, musicality and self-assessment, Pearson's r  
156 correlations were computed. Pearson's r-values and p-values of the significance test are reported. In order  
157 to discover the degree to which our dependent variables discriminate between NM and MU, a  
158 discriminant function analysis with predictive classification of cases was conducted. The discriminant  
159 analysis included all four DLF thresholds, BRAMS total score and self-reported measures for a total of  
160 seven continuous, numeric variables and one categorical variable with two levels (NM, MU).

## 161 **Results**

### 162 *Pitch discrimination thresholds*

163 The 2X4 mixed RMANOVA on group (MU vs. NM, between-subjects factor) and threshold (CT, PT,  
164 IRN and DP, within-subjects factors) showed a within-subjects main effect of sound type;  
165  $F(3,108)=38.137$ ,  $p<0.001$ , Observed Power=1.0, an interaction effect  $F(3,108)=11.754$ ,  $p<0.001$ ,  
166 Observed Power=0.999, and a between-subjects main effect  $F(1,36)=29.205$ ,  $p<0.001$ , Observed  
167 Power=1.0. Post-hoc t-tests were significant for all conditions ( $p<0.016$ ).

168 Group means show that musicians had lower thresholds for each sound type category (Fig. 2, Supp. Table  
169 1). Bar graphs in Figure 2 illustrates the group mean values for each sound type category, showing lower  
170 means for the musician group in all categories, relative to Non-musicians. Taken together, the data show  
171 that musicians can hear smaller pitch differences than Non-musicians in all four pitch-evoking sound type  
172 categories, with the greatest difference in the DP condition and the smallest difference in the CT  
173 condition.

174 -Figure 2-



175 Figure 2. Bar graph shows mean DLF thresholds (+/- 1 SE). Musicians have smaller (better) pitch  
176 discrimination thresholds in all conditions, relative to non-musicians (\* $p < 0.05$ ; \*\* $p < 0.01$ ).

177

178 To examine group differences in threshold variance a 2X4 mixed RMANOVA on group (MU vs. NM,  
179 between-subjects factor) and threshold variance per sound type (DP, PT, IRN and CT, within-subject  
180 factors). For this analysis, standard deviation was computed from the four recorded threshold  
181 measurements per sound type. Results showed a within-subjects main effect of sound type;  
182  $F(3,108)=18.265$ ,  $p < 0.001$ , Observed Power=1.0, an interaction effect  $F(3,108)=3.866$ ,  $p=0.011$ ,  
183 Observed Power=0.811, and a between-subjects main effect  $F(1,36)=11.702$ ,  $p=0.002$ , Observed  
184 Power=0.914. Post-hoc t-tests were significant for DP and PT ( $p < 0.007$ ), but not IRN and CT ( $p > 0.058$ ).  
185 Examination of group means showed that threshold variance is smaller in MU than NM in the DP and PT  
186 condition (Supp. Table 2).

### 187 *Relationships between pitch discrimination thresholds, self-reports and musical aptitude measures*

188 Pearson's correlations show that better discrimination thresholds are associated with a higher self-report  
189 of musical skill and better scores on all tests of BRAMs musical aptitude. Correlations are reported in  
190 Supplementary Table 2. Figure 3 shows individual data for the representative correlations between DLFs,  
191 self-report and BRAMS total score. Figure 3 (left column) illustrates that lower (better) DLFs are  
192 associated with higher self-reports of musical skill. The spread of the data in Figure 3 also illustrates  
193 greater variance in self-report among NM compared to MU, reflecting a wider range of self-assessed  
194 musical experience in the NM group. Figure 2 (right column) shows the relationships between DLFs and  
195 BRAMS total score. Consistent negative correlations suggest that smaller DLFs are associated with  
196 higher musical aptitude.

197

-Figure 3-

198 Figure 3. Scatterplots of individual data for Musicians (red) and Non-musicians (black) with regression  
 199 lines. Left column shows relationships between pitch discrimination thresholds self-reported (subjective)  
 200 musical skill (scaled between 1-9, with 1 being novice, 9 professional). Higher self-report is associated  
 201 with smaller (better) thresholds. Right column shows relationships between pitch discrimination  
 202 thresholds behavioral scores obtained from the BRAMS musical skills test (objective). Higher score is  
 203 associated with smaller (better) thresholds.

#### 204 *Discriminant analysis*

205 A discriminant analysis was conducted to determine which of our variables contributed most to group  
 206 separation and to test whether an individual's group category could be correctly identified based on our  
 207 continuous numeric experimental measures. Continuous variables were DP, PT, IRN and CT DLFs as  
 208 well as SR Musical Skill and BRAMS Avg./Total score. Table 2 shows significant mean differences were  
 209 observed for all variables ( $p < 0.021$ ) except for SR Music Listening Frequency ( $p = 0.774$ ).

| Table 2. Discriminant analysis results including tests of equality of group means and variable loadings.                                                                                     |               |         |     |     |        |                             |
|----------------------------------------------------------------------------------------------------------------------------------------------------------------------------------------------|---------------|---------|-----|-----|--------|-----------------------------|
| Metric                                                                                                                                                                                       | Wilks' Lambda | F       | df1 | df2 | Sig.   | Structure Matrix (Loadings) |
| Dich. Pitch DLF                                                                                                                                                                              | 18.502        | 18.502  | 1   | 36  | <0.001 | -.295                       |
| Pure Tone DLF                                                                                                                                                                                | 25.668        | 25.668  | 1   | 36  | <0.001 | -.348*                      |
| Itr. Rip. Noise DLF                                                                                                                                                                          | 6.333         | 6.333   | 1   | 36  | .016   | -.173                       |
| Comp. Tone DLF                                                                                                                                                                               | 16.646        | 16.646  | 1   | 36  | <0.001 | -.280                       |
| SR Musical Skill                                                                                                                                                                             | 141.793       | 141.793 | 1   | 36  | <0.001 | .817*                       |
| BRAMS Avg./Total                                                                                                                                                                             | 19.747        | 19.747  | 1   | 36  | <0.001 | .305*                       |
| Structure Matrix (Loadings) shows pooled within-groups correlations between discriminating variables and standardized canonical discriminant functions, *denotes important correlations >0.3 |               |         |     |     |        |                             |

211 The canonical discriminant function showed a significant association between groups and variables;  
212 Wilks' Lambda=0.145, Chi-square=60.800,  $p < 0.001$ , accounting for 85.5% of the between-group  
213 variability. Examination of the discriminant loadings (Table 4) showed three significant predictors (i.e.  
214  $> 0.3$ ), namely SR Musical Skill (.811) and PT DLF (-.343), and BRAMS Avg./Total score (.301). The  
215 weakest predictor was IRN DLF (-.169). Cross-validated classification showed that overall, 89.2% of the  
216 subjects were correctly classified into MU and NM groups. It should be noted that log determinants of  
217 this analysis showed large differences and Box's M was significant, suggesting that the assumption of  
218 equality of covariance matrices was violated. However, this problem is somewhat allayed given that  
219 normality is not a critical assumption for discriminant analysis.

## 220 **Discussion**

221 We have answered two main questions in this study: 1) Are musicians better at perceiving specific pitch-  
222 related acoustics? and 2) Are psychoacoustic thresholds related to objective and subjective measures of  
223 music ability? To answer these questions, we recorded psychoacoustic DLFs to four types of pitch-  
224 eliciting sounds in 18 Non-musicians and 20 Musicians and obtained objective and subjective measures  
225 of musicianship from all participants. Sound types for DLF measurement included Dichotic (Huggins')  
226 pitch, Pure Tones, Iterated Rippled Noise and Complex Tones. Objective measures of musicianship were  
227 obtained from the output of the BRAMS online music aptitude test and subjective assessment of music  
228 ability and listening were obtained through the questionnaire.

229 To answer the first question, DLF data were subjected to a RMANOVA with four within-subject factors  
230 of sound type and two between-subject factors of group. Results showed group differences across all  
231 sound types, with the greatest differences for dichotic and pure tone stimuli. These data refute our initial  
232 hypothesis that pitch-related temporal encoding mechanisms would be most impacted by musicianship;  
233 instead suggesting that music-related plasticity is not restricted to types of pitches. The greatest difference  
234 between Musician and Non-musician discrimination thresholds in the dichotic condition suggests that

235 higher-order mechanisms, such as those requiring a combination of sound across the ears, are greatly  
236 impacted by musical training.

237 Several hypotheses could reasonably explain our findings. One hypothesis is that mechanisms of music-  
238 related brain plasticity are not restricted to place or temporal code encoding mechanisms in peripheral or  
239 brainstem nuclei (11), but may also occur cortically (12), or at least beyond the superior olive where  
240 dichotic sounds first combine. Unfortunately, our current data do not permit further elucidation on the  
241 veracity of this postulate because we do not have encoding data to test brainstem and cortical plasticity  
242 specifically. An alternative hypothesis is that playing music sharpens one's ability to extract pitch  
243 percepts in conditions where the pitch strength is less salient, such as the dichotic and iterated rippled  
244 noise conditions. If this hypothesis were true, we might expect that the largest differences between the  
245 two groups would be in the least salient conditions. Whereas the largest threshold difference is in the  
246 dichotic condition (less salient pitch), the second largest threshold difference is observed in the pure tone  
247 condition, which has the most salient pitch strength. Although our data do not directly address the issue of  
248 pitch strength, the fact that the largest differences are observed with both strong and weak pitch percepts  
249 diminishes this hypothesis' likelihood. A third, big picture, hypothesis is that Musicians possess a greater  
250 aptitude to learn the task than Non-musicians. If this were true, we would expect Musicians to learn the  
251 task faster than Non-musicians. A post-hoc examination of the within-session change in threshold showed  
252 that Non-musicians did have more variability, measured by standard deviation (Supp. Table 4). However,  
253 mean magnitudes of the within-session change in threshold over the four runs, computed by subtracting  
254 the threshold obtained in the first run from the threshold obtained in the last run, did not appear to differ  
255 between groups (Supp. Table 4). To verify our observations, we performed two RMANOVAs for sound  
256 type and group on the standard deviation and within-session change data. Results showed that Musicians  
257 had lower standard deviation in thresholds to dichotic and pure tone stimuli, compared to Non-musicians,  
258 but only in the pure and complex tone conditions. No significant differences were observed for within- or  
259 between-subject comparisons of the within-session threshold change magnitude. Taken together, these

260 data suggest that acclimatization or learning trajectories from task beginning to end is similar in  
261 Musicians and Non-musicians and that musicianship positively influences dichotic and pure tone pitch  
262 discrimination, in part by stabilizing threshold reliability.

263 In answering the second question, we showed evidence for a relationship between psychoacoustic pitch  
264 discrimination and measures of subjective and objective music ability. The correlation data show that  
265 discrimination thresholds across all four pitch types were negatively correlated with a higher subjective  
266 rating of musicianship, such that individuals who rated themselves with musical ability closer to  
267 “professional” on a subjective scale, could hear smaller pitch differences in all four sound conditions.  
268 Conversely, individuals who rated themselves with a lower musical ability (i.e. closer to “novice” on the  
269 same scale) had greater (poorer) DLFs. To the authors’ knowledge this is the first time that such a  
270 relationship has been reported. The results imply that a person’s self-assessment can be a good predictor  
271 of their psychoacoustic threshold. It should be noted however, that while the correlations between self-  
272 reported music ability and DLF are significant, more than half of the r-values portray a moderately strong  
273 relationship (i.e.  $<0.5$ ); suggesting that other, untested, variables account for additional variance in the  
274 relationship. Therefore, while the connection between basic sensory ability and self-assessment of music  
275 ability is suggested here, it is only partially accounted for.

276 Regarding objective measures of music ability, it appears that the online music aptitude tests of Melody,  
277 Pitch, and the average of all music scores showed a consistent relationship with our psychoacoustic test  
278 results. In general, higher scores were related to smaller DLFs, suggesting that those who scored well on  
279 the BRAMS tests could discriminate sounds with smaller pitch differences. It is interesting to note that  
280 although Melody and Pitch scores correlated with psychoacoustic discrimination thresholds, Timing  
281 scores did not. Relatedly, Melody and Pitch were correlated to each other;  $r=0.419$ ,  $p=0.010$ , but neither  
282 correlated with Timing;  $p>0.222$ . Timing scores did correlate, however, with SR Musical Skill;  $r=0.419$ ,  
283  $p=0.010$ , and BRAMS Avg./Total score;  $r=0.505$ ,  $p=0.001$ , suggesting that rhythmic ability is related to  
284 musical aptitude and self-assessment of musical skill, but may be independent of pitch perception. Taken

285 together, the correlation data show that the ability to discriminate small pitch differences can be reflected  
286 in global musical abilities and an individual's evaluation of their own musical aptitude. This implies that  
287 sensory thresholds for pitch discrimination underlie, at least in part, one's musical ability and self-  
288 appraisal of that ability. Furthermore, relationships between sensory threshold for pitch and more broad  
289 measures of musicianship are not restricted to a specific mechanism of pitch processing.

290 The Discriminant Analysis allowed us to detect the degree to which our variables discriminate between  
291 Musicians and Non-musicians. The variables that contributed most to the predictions of group  
292 membership were 1) Self-report of musical ability on a scale of 1-9, 2) Pure Tone DLFs and 3) BRAMS  
293 Avg./Total score. While the relationship between pure tone perception, musical aptitude and musicianship  
294 is well established, the contribution of a self-report variable is novel as far as the authors' knowledge.  
295 Here, we show that self-evaluation of musical competence can be meaningfully applied to classify groups  
296 and is related to objective measures of music and perceptual ability. Self-evaluation of competence, or  
297 self-competence is defined as the sense of one's capacity. (31) Previous data on this topic show that  
298 general self-competence is as associated with measures of cognitive ability such as IQ and academic  
299 achievement measured by GPA. (32) Our data support the argument that self-evaluation of competence is  
300 a meaningful measure of ability and outcomes (33) and extend into musicianship.

301 In addition to the finding of self-report as a meaningful measure, the discriminant analysis showed  
302 common characteristics of musicians include psychoacoustic, musical and self-evaluated abilities. This  
303 gives rise to the notion that all three areas may interact to define a person who is talented or skilled in  
304 music. It is interesting to note that the self-reported music listening scale did not distinguish between  
305 groups. This supports several lines of research showing that active music-making, rather than listening  
306 alone, is a catalyst for brain plasticity and internalized perceptual change (23, 34, 35).

307 In conclusion, this study sheds light on several aspects of musicianship. First, we show that the influence  
308 of musicianship is not limited to pitch judgements involving monotic/diotic mechanisms but also includes  
309 those that rely on dichotic integration. Second, our data show that basic perceptual thresholds are related

310 to measures of both subjective and objective musical ability. And third, the data suggest that self-  
311 evaluation of musical ability is a meaningful part of musicianship such that high evaluation of  
312 competence are characteristic of musician group members. Taken together, the data update the  
313 neurobehavioral profile of musicians and extend creative ability measurements into new arenas.

#### 314 **Acknowledgements**

315 The authors gratefully acknowledge the class of University of the Pacific 2020 for participation in this  
316 study and Dr. Ganesh Swaminathan for his valuable comments on the manuscript. This work was  
317 supported by a 2019 Scholarly/Artistic Activities Grant (SAAG) from the University of the Pacific  
318 Faculty Research Committee.

319

320

## 321 References

- 322 1. Munte TF, Altenmuller E, Jancke L. The musician's brain as a model of neuroplasticity.  
323 *NatRevNeurosci.* 2002;3(6):473-8.
- 324 2. Micheyl C, Delhommeau K, Perrot X, Oxenham AJ. Influence of musical and psychoacoustical  
325 training on pitch discrimination. *Hear Res.* 2006;219(1-2):36-47.
- 326 3. Moore BC. Relation between the critical bandwidth and the frequency-difference limen. *The*  
327 *Journal of the Acoustical Society of America.* 1974;55(2):359.
- 328 4. Wier CC, Jesteadt W, Green DM. Frequency discrimination as a function of frequency and  
329 sensation level. *The Journal of the Acoustical Society of America.* 1977;61(1):178-84.
- 330 5. Moore JK, Linthicum FH, Jr. The human auditory system: a timeline of development. *Int J Audiol.*  
331 2007;46(9):460-78.
- 332 6. Kishon-Rabin L, Amir O, Vexler Y, Zaltz Y. Pitch discrimination: are professional musicians better  
333 than non-musicians? *J Basic Clin Physiol Pharmacol.* 2001;12(2 Suppl):125-43.
- 334 7. Krishnan A, Gandour JT, Bidelman GM, Swaminathan J. Experience-dependent neural  
335 representation of dynamic pitch in the brainstem. *Neuroreport.* 2009;20(4):408-13.
- 336 8. Musacchia G, Sams M, Skoe E, Kraus N. Musicians have enhanced subcortical auditory and  
337 audiovisual processing of speech and music. *Proceedings of the National Academy of Sciences of the*  
338 *United States of America.* 2007;104(40):15894-8.
- 339 9. Zatorre RJ. Neural Specialization for Tonal Processing. In: Zatorre RJ, Peretz I, editors. *The*  
340 *biological foundations of music.* *Annals of the New York Academy of Sciences -- v. 930.: ANYAS;* 2001. p.  
341 193-210.
- 342 10. Wong PC, Skoe E, Russo NM, Dees T, Kraus N. Musical experience shapes human brainstem  
343 encoding of linguistic pitch patterns. *Nat Neurosci.* 2007;10(4):420-2.
- 344 11. Pickles JO. The auditory nerve. In: Pickles JO, editor. *An Introduction to the Physiology of*  
345 *Hearing.* Fourth ed. Lieden, The Netherlands: Brill; 2013. p. 73-83.
- 346 12. Cariani PA. Temporal codes and computations for sensory representation and scene analysis.  
347 *IEEE TransNeural Netw.* 2004;15(5):1100-11.
- 348 13. Tramo MJ, Cariani PA, Koh CK, Makris N, Braidia LD. Neurophysiology and neuroanatomy of pitch  
349 perception: auditory cortex. *Ann N Y Acad Sci.* 2005;1060:148-74.
- 350 14. Pickles JO. Physiological correlates of auditory psychophysics. In: Pickles JO, editor. *An*  
351 *Introduction to the Physiology of Hearing.* Fourth ed. Lieden, The Netherlands: Brill; 2013. p. 278-81.
- 352 15. Zhang Y, Suga N. Modulation of responses and frequency tuning of thalamic and collicular  
353 neurons by cortical activation in mustached bats. *JNeurophysiol.* 2000;84(1):325-33.
- 354 16. Bergan JF, Ro P, Ro D, Knudsen EI. Hunting increases adaptive auditory map plasticity in adult  
355 barn owls. *JNeurosci.* 2005;25(42):9816-20.
- 356 17. Coffey EBJ, Musacchia G, Zatorre RJ. Cortical Correlates of the Auditory Frequency-Following  
357 and Onset Responses: EEG and fMRI Evidence. *The Journal of neuroscience : the official journal of the*  
358 *Society for Neuroscience.* 2017;37(4):830-8.
- 359 18. Cramer EMH, W.H. Creation of pitch through binaural interaction. *The Journal of the Acoustical*  
360 *Society of America.* 1958(30):412-7.
- 361 19. Yost WA. Thresholds for segregating a narrow-band from a broadband noise based on interaural  
362 phase and level differences. *The Journal of the Acoustical Society of America.* 1991;89(2):838-44.
- 363 20. Hairston WD, Hodges DA, Burdette JH, Wallace MT. Auditory enhancement of visual temporal  
364 order judgment. *Neuroreport.* 2006;17(8):791-5.
- 365 21. Walker KM, Schnupp JW, Hart-Schnupp SM, King AJ, Bizley JK. Pitch discrimination by ferrets for  
366 simple and complex sounds. *The Journal of the Acoustical Society of America.* 2009;126(3):1321-35.



- 367 22. Musacchia G, Strait D, Kraus N. Relationships between behavior, brainstem and cortical  
368 encoding of seen and heard speech in musicians and non-musicians. *Hear Res.* 2008;241(1-2):34-42.
- 369 23. Kraus N, Strait DL. Emergence of biological markers of musicianship with school-based music  
370 instruction. *Ann N Y Acad Sci.* 2015;1337:163-9.
- 371 24. Skoe E, Kraus N. A little goes a long way: how the adult brain is shaped by musical training in  
372 childhood. *JNeurosci.* 2012;32(34):11507-10.
- 373 25. Yost WA. Pitch of iterated rippled noise. *The Journal of the Acoustical Society of America.*  
374 1996;100(1):511-8.
- 375 26. Yost WA, Patterson R, Sheft S. A time domain description for the pitch strength of iterated  
376 rippled noise. *The Journal of the Acoustical Society of America.* 1996;99(2):1066-78.
- 377 27. Bidelman GM. Sensitivity of the cortical pitch onset response to height, time-variance, and  
378 directionality of dynamic pitch. *Neurosci Lett.* 2015;603:89-93.
- 379 28. Peretz I, Champod AS, Hyde K. Varieties of musical disorders. The Montreal Battery of Evaluation  
380 of Amusia. *Ann N Y Acad Sci.* 2003;999:58-75.
- 381 29. Tiku ML. Power function of the F-test under non-normal situations. *Journal of the American*  
382 *Statistical Association.* 1971(66):913-5.
- 383 30. Tan WY. Sampling distributions and robustness of t, f and variance-ratio in two samples and  
384 ANOVA Models with respect to departure from normality. *Communications in Statistics - Theory and*  
385 *Methods.* 1982(11):2485-511.
- 386 31. Tafarodi RW, Swann WB, Jr. Self-liking and self-competence as dimensions of global self-esteem:  
387 initial validation of a measure. *J Person Assess.* 1995;65(2):322-42.
- 388 32. Mar RA, DeYoung CG, Higgins DM, Peterson JB. Self-liking and self-competence separate self-  
389 evaluation from self-deception: associations with personality, ability, and achievement. *J Pers.*  
390 2006;74(4):1047-78.
- 391 33. Baumeister RF, Campbell JD, Krueger JI, Vohs KD. Does High Self-Esteem Cause Better  
392 Performance, Interpersonal Success, Happiness, or Healthier Lifestyles? *Psychol Sci Public Interest.*  
393 2003;4(1):1-44.
- 394 34. Musacchia G, Ortiz-Mantilla S, Choudhury N, Realpe-Bonilla T, Roesler C, Benasich AA. Active  
395 auditory experience in infancy promotes brain plasticity in Theta and Gamma oscillations. *Dev Cogn*  
396 *Neurosci.* 2017;26:9-19.
- 397 35. Gerry D, Unrau A, Trainor LJ. Active music classes in infancy enhance musical, communicative  
398 and social development. *DevSci.* 2012;15(3):398-407.

399

400

# Figure 1. Stimuli

## A. Dichotic Pitch

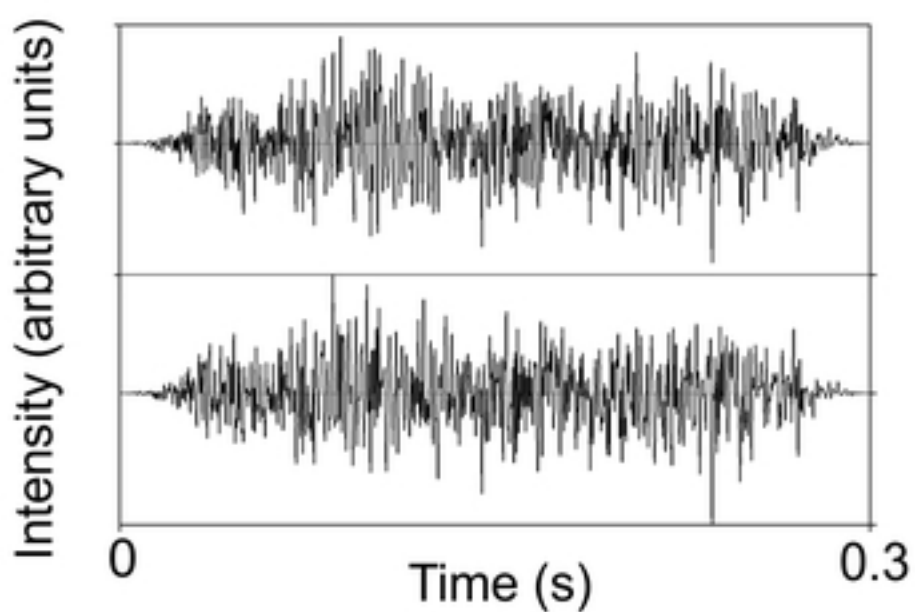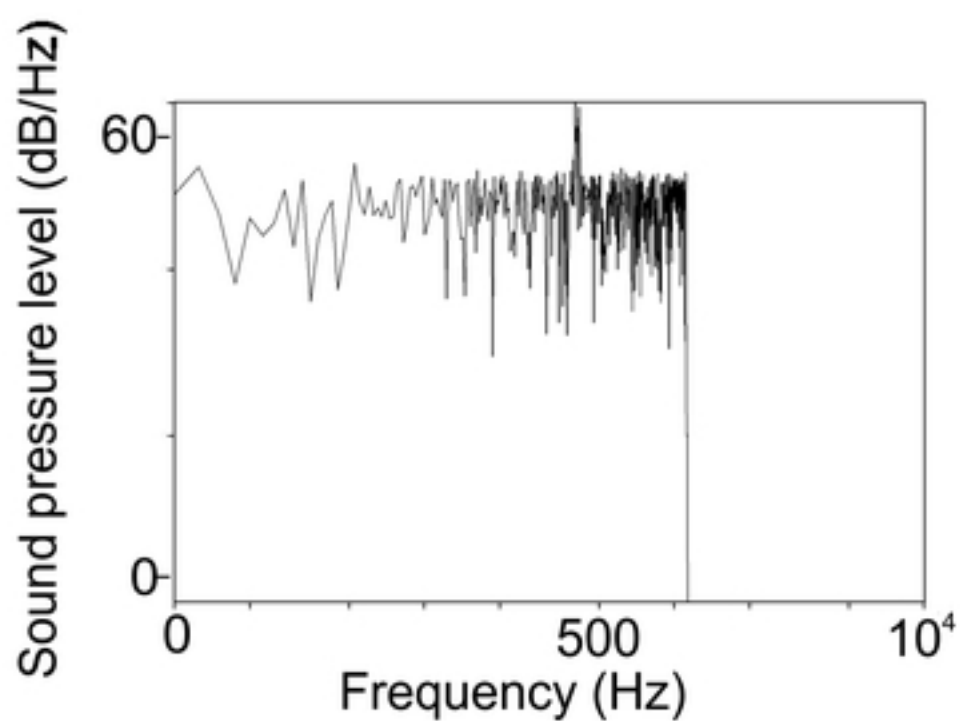

## B. Pure Tone

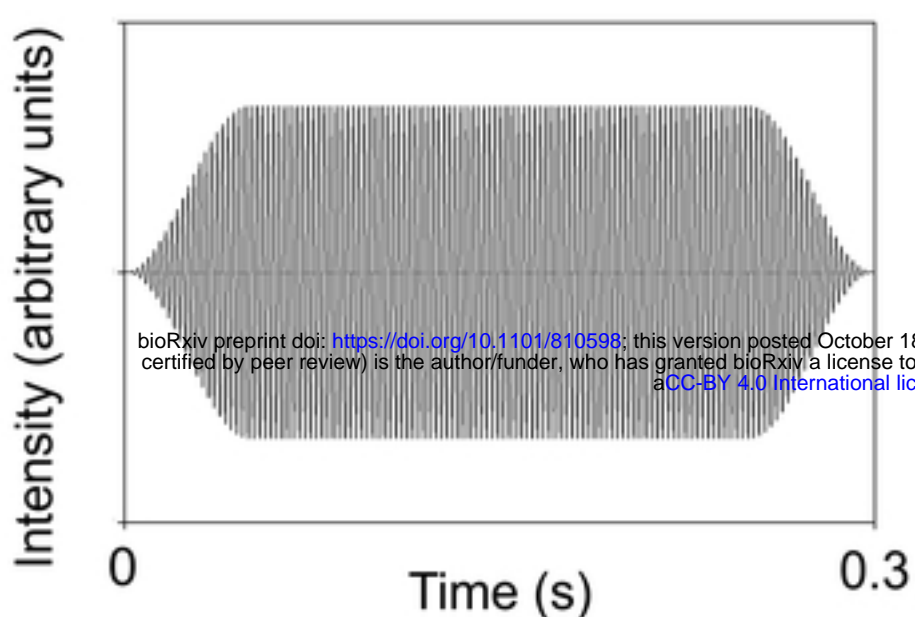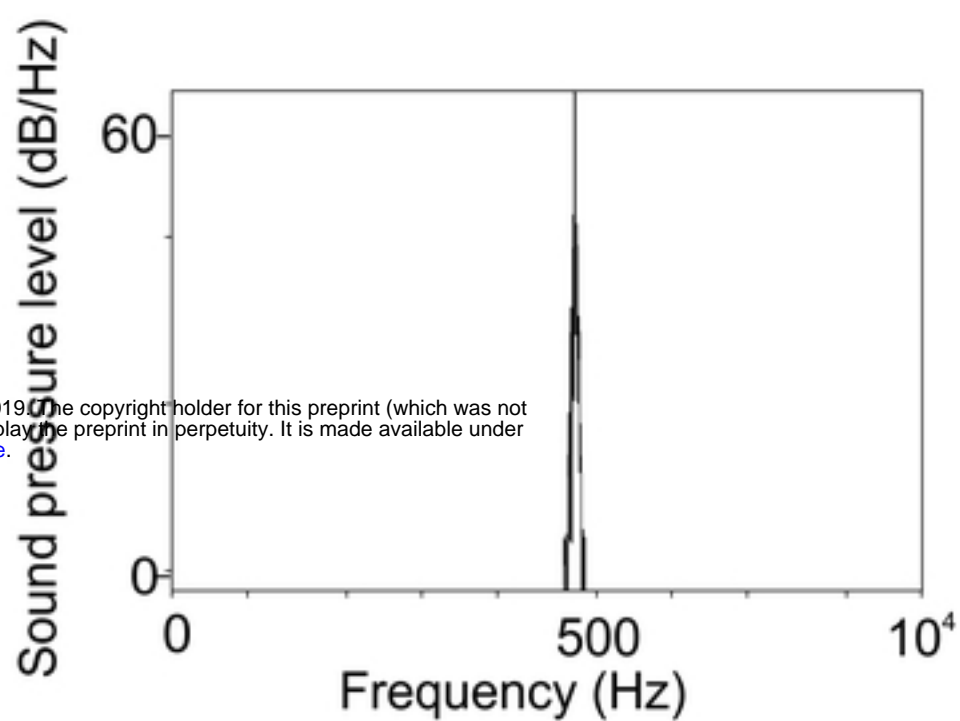

## C. Iterated Rippled Noise

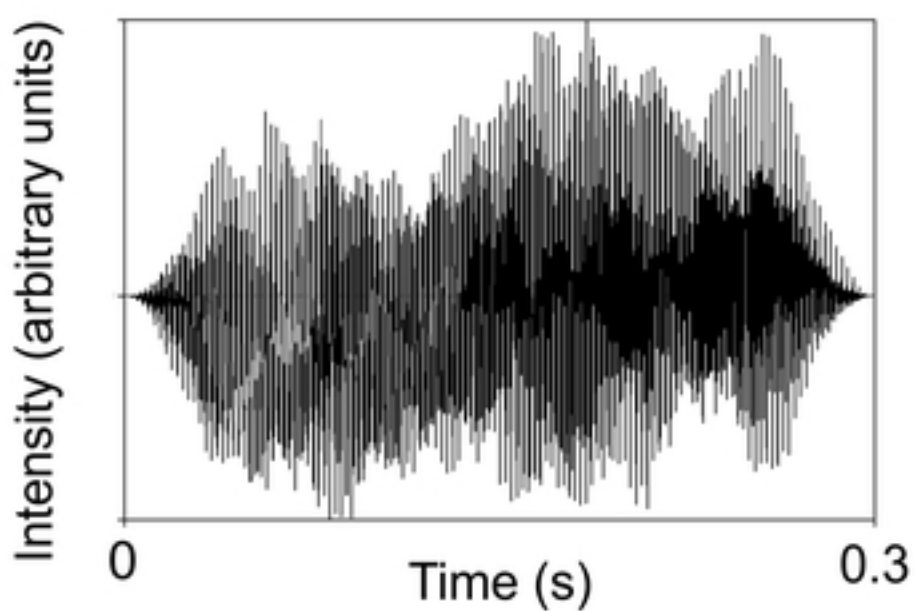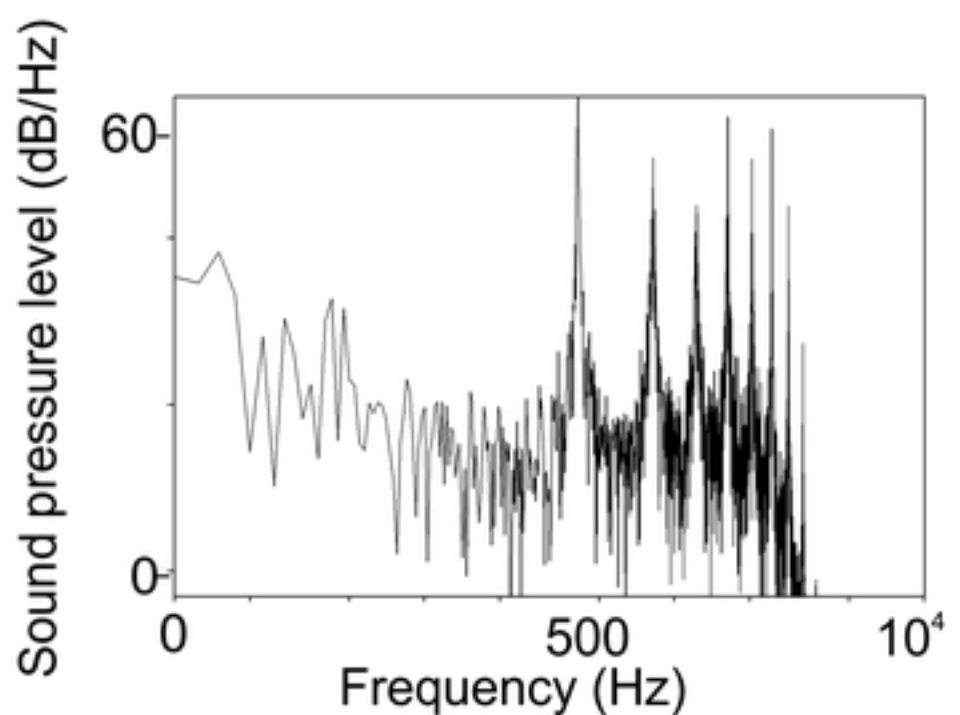

## D. Complex Tone

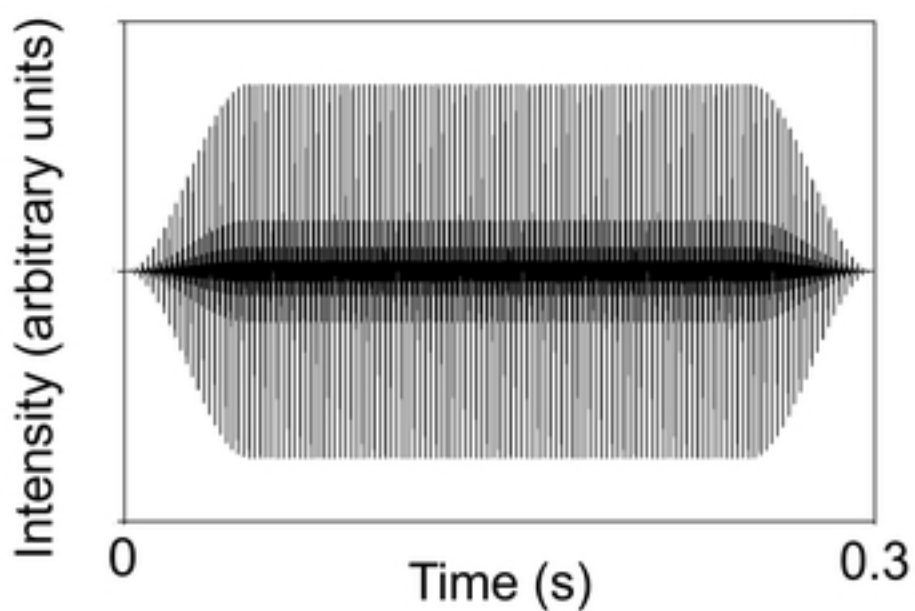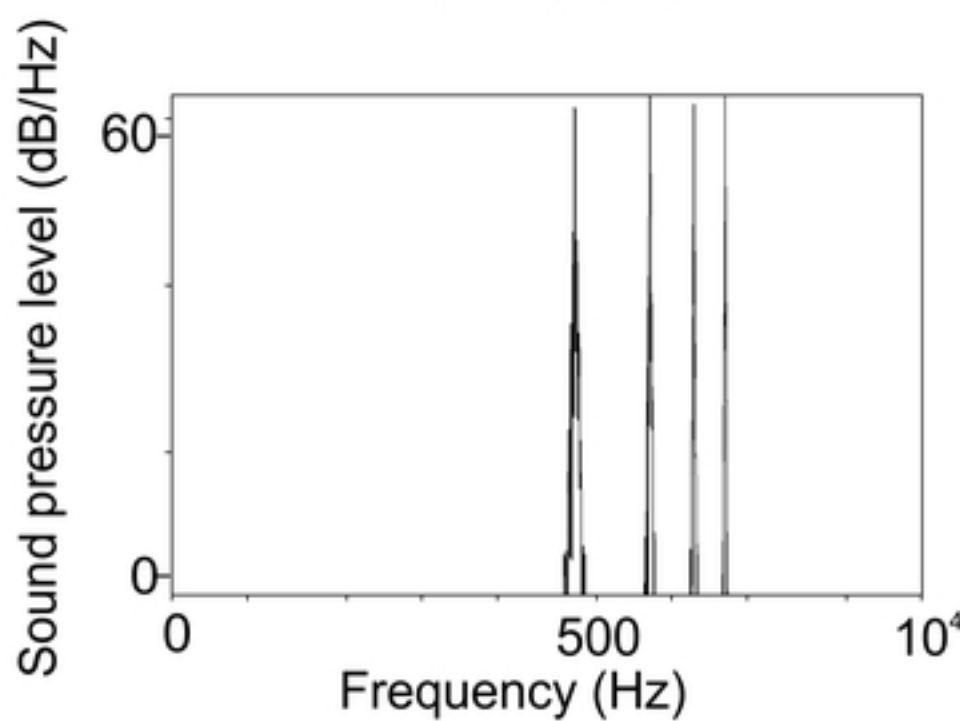

Figure 1

Figure 2.

## Mean Pitch discrimination thresholds in Musicians and Non-musicians

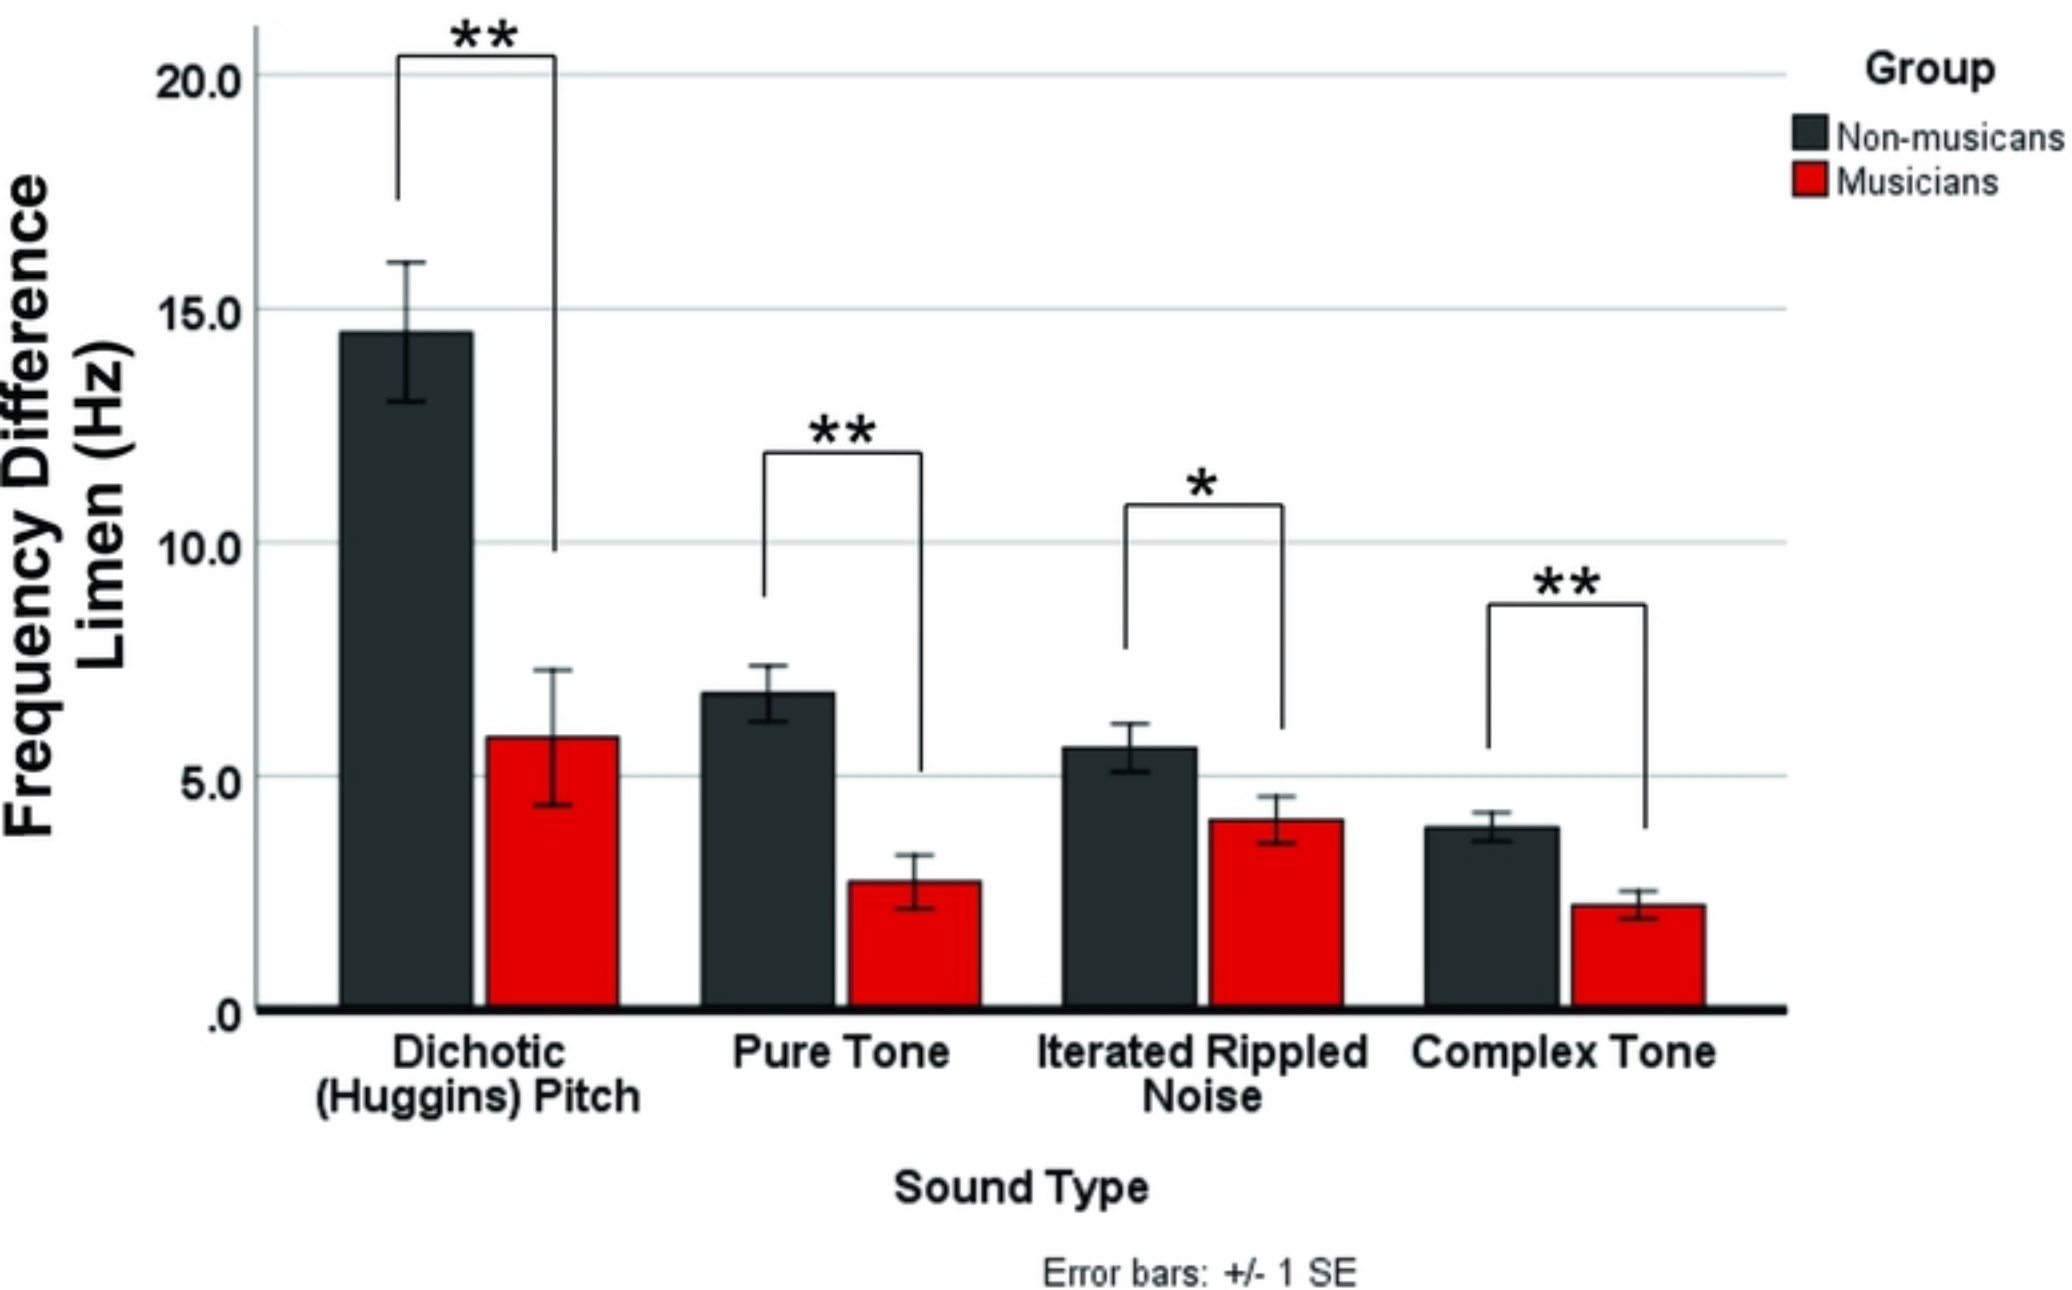

Figure 2

Figure 3.

Relationships between pitch discrimination thresholds, and measures of objective and subjective music ability

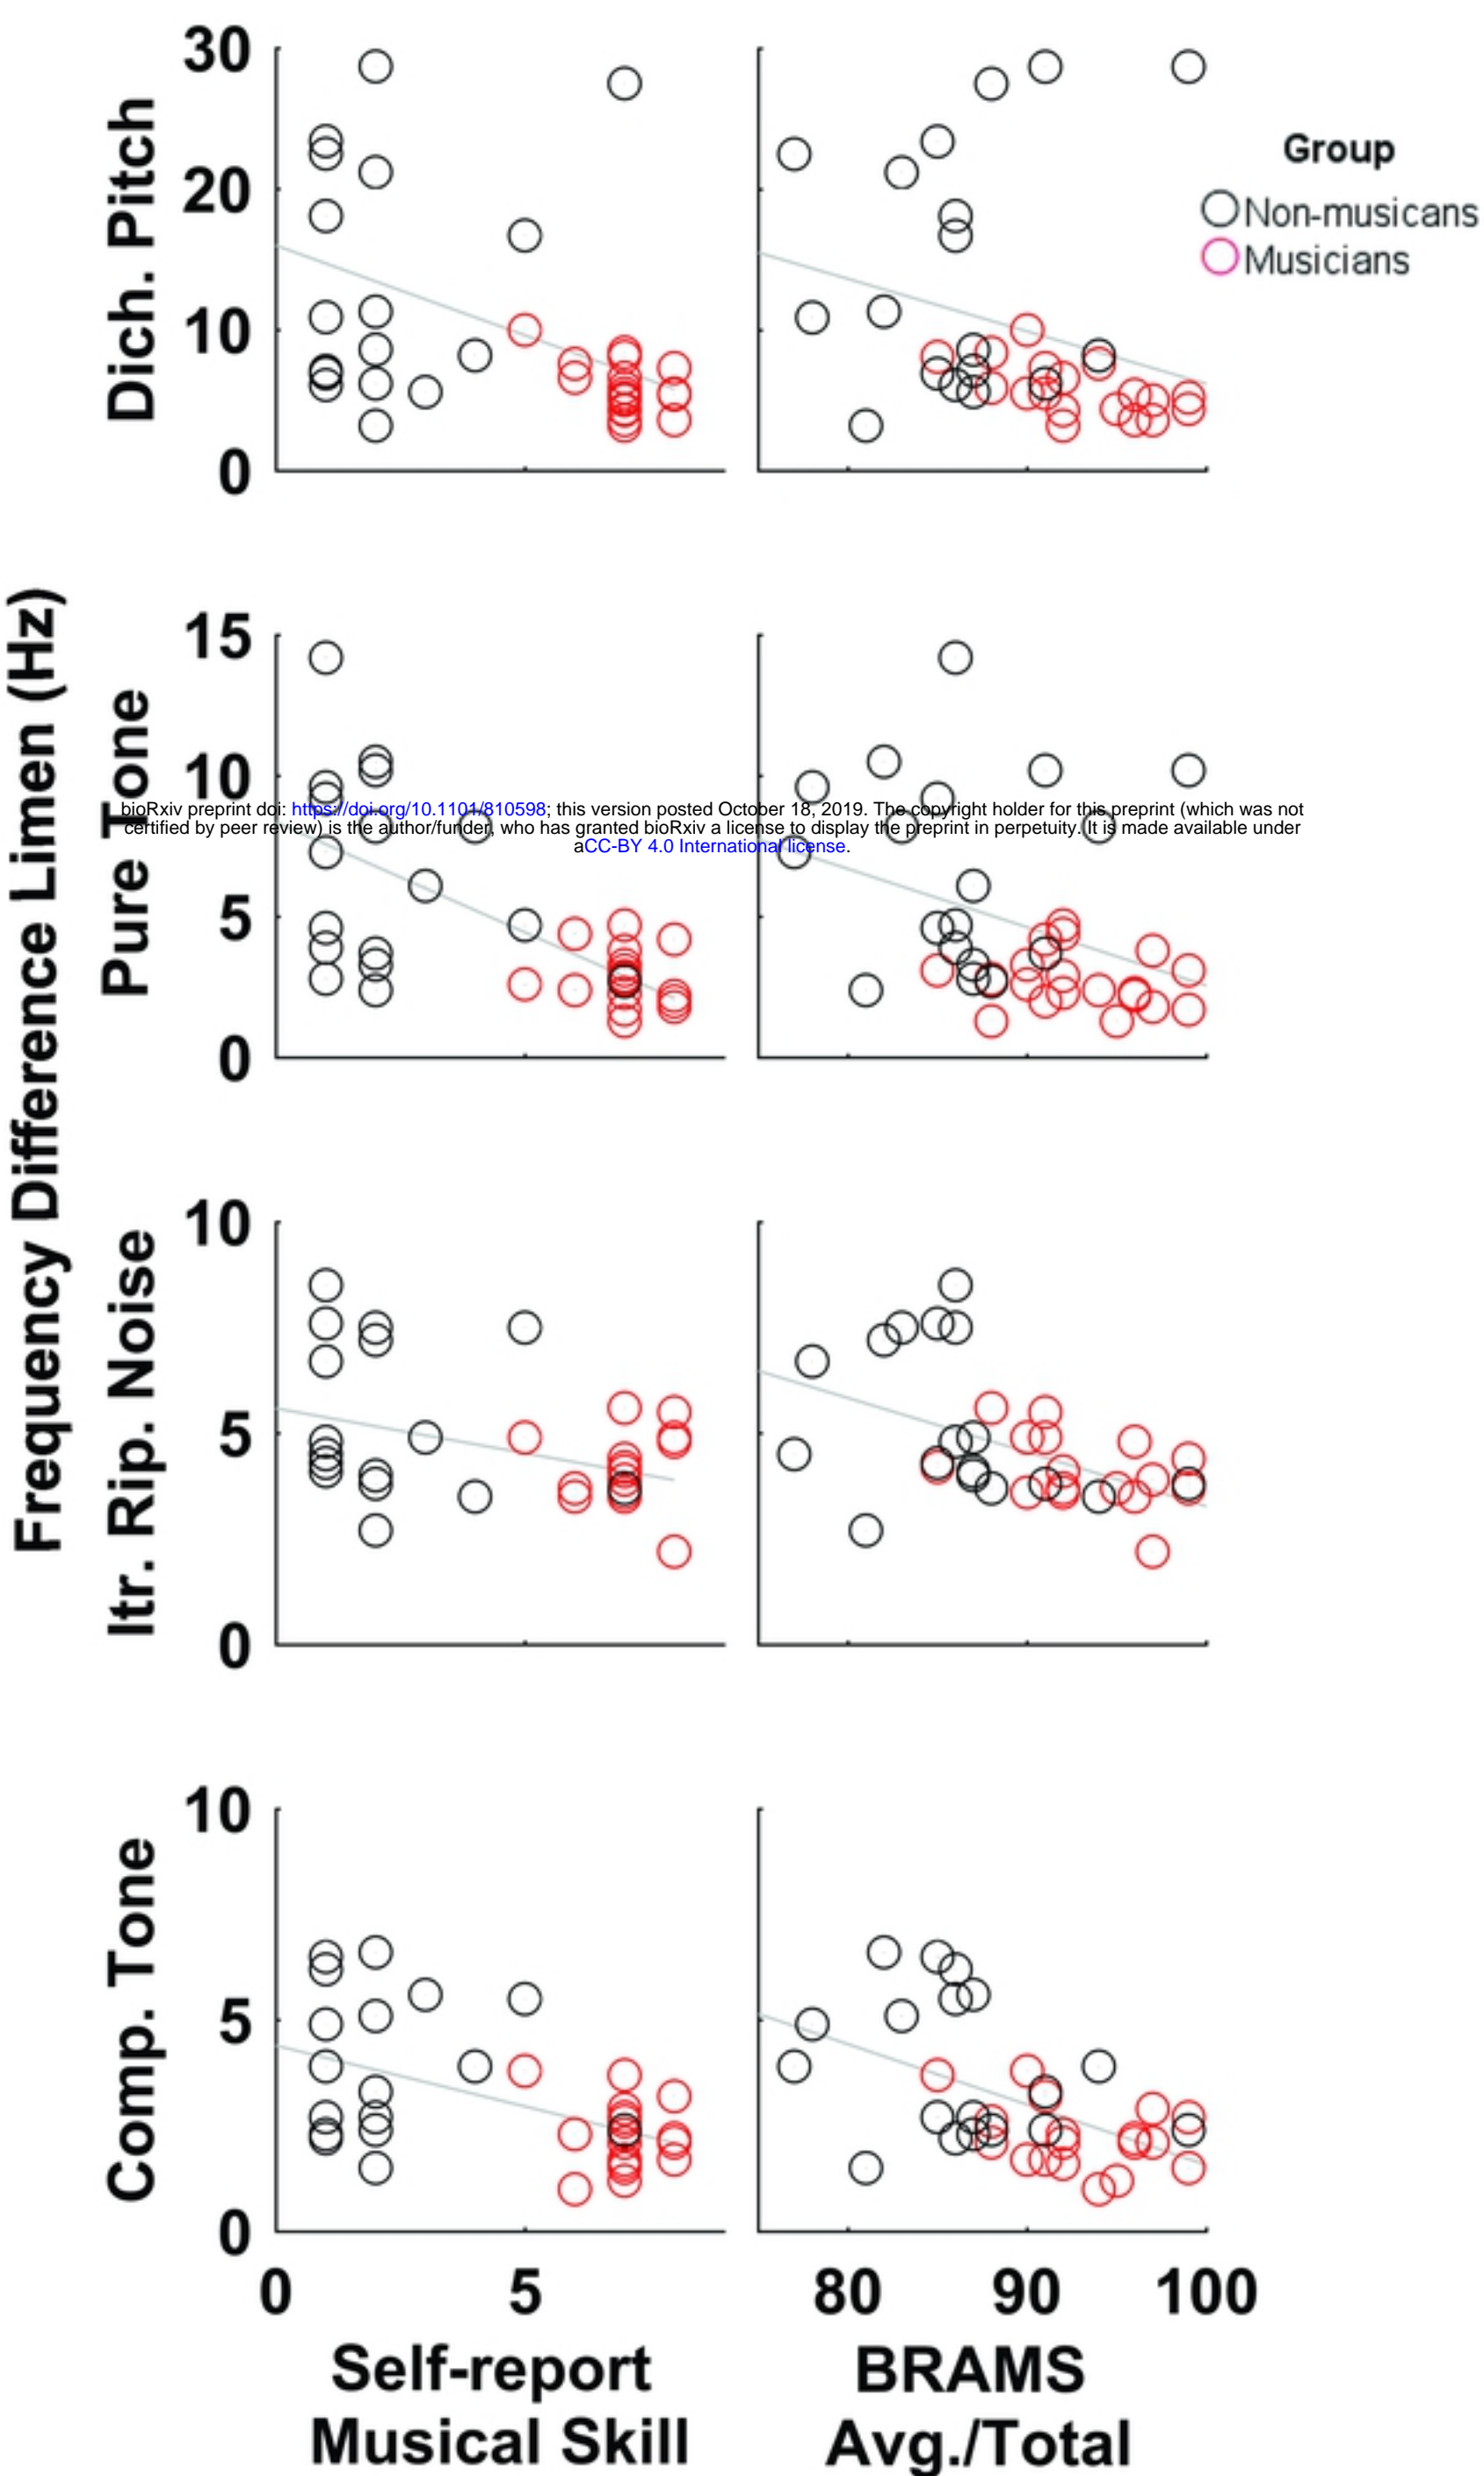

Figure 3
